## RESEARCH ARTICLE

# A wearable-based sports health monitoring system using CNN and LSTM with self-attentions

Tao Yuhuan Wang<sup>1</sup>, Jiajia Cui<sup>2</sup>, Yao Fan<sup>1\*</sup>

**1** School of Physical Education, Northeast Normal University, Changchun Jilin, China, **2** Jilin Sport University, Changchun Jilin, China

\* [fany341@nenu.edu.cn](mailto:fany341@nenu.edu.cn)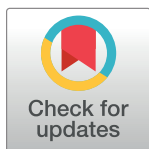

## Abstract

Sports performance and health monitoring are essential for athletes to maintain peak performance and avoid potential injuries. In this paper, we propose a sports health monitoring system that utilizes wearable devices, cloud computing, and deep learning to monitor the health status of sports persons. The system consists of a wearable device that collects various physiological parameters and a cloud server that contains a deep learning model to predict the sportsperson's health status. The proposed model combines a Convolutional Neural Network (CNN), Long Short-Term Memory (LSTM), and self-attention mechanisms. The model is trained on a large dataset of sports persons' physiological data and achieves an accuracy of 93%, specificity of 94%, precision of 95%, and an F1 score of 92%. The sports person can access the cloud server using their mobile phone to receive a report of their health status, which can be used to monitor their performance and make any necessary adjustments to their training or competition schedule.

## OPEN ACCESS

**Citation:** Wang TY, Cui J, Fan Y (2023) A wearable-based sports health monitoring system using CNN and LSTM with self-attentions. PLoS ONE 18(10): e0292012. <https://doi.org/10.1371/journal.pone.0292012>

**Editor:** Sathishkumar Veerappampalayam Easwaramoorthy, Jeonbuk National University, REPUBLIC OF KOREA

**Received:** June 21, 2023

**Accepted:** September 11, 2023

**Published:** October 11, 2023

**Copyright:** © 2023 Wang et al. This is an open access article distributed under the terms of the [Creative Commons Attribution License](https://creativecommons.org/licenses/by/4.0/), which permits unrestricted use, distribution, and reproduction in any medium, provided the original author and source are credited.

**Data Availability Statement:** All relevant data are within the paper.

**Funding:** The authors received no specific funding for this work.

**Competing interests:** The authors have declared that no competing interests exist.

## 1. Introduction

The sports industry is constantly evolving, with technological advancements contributing to the growth of the industry. The advent of artificial intelligence (AI) has revolutionized the way sports teams and athletes train and compete. AI-based sports technology has enabled teams and athletes to gather and analyze data, monitor performance, and make informed decisions to improve their performance. Wearable devices are one such technology that has become increasingly popular in the sports industry. This paper explores the potential of AI-based sports technology for wearable devices in revolutionizing the sports industry. Wearable devices are small, portable electronic devices that athletes can wear to monitor various aspects of their performance. Wearable devices can collect data on various parameters such as heart rate, speed, distance, and acceleration. This data can be used to monitor and analyze an athlete's performance, track their progress, and identify areas for improvement [1,2].

AI-based sports technology for wearable devices involves the use of algorithms and machine learning to analyze data collected by wearable devices. These algorithms can provide insights into athletes' performance, such as their heart rate variability, energy expenditure, and

sleep quality. Deep learning can also predict an athlete's performance and identify potential injuries before they occur. AI-based sports technology can also create personalized training programs for athletes based on their data. These programs can take into account an athlete's strengths and weaknesses and provide targeted training to improve their performance. AI-based sports technology can also analyze an athlete's performance in real time and provide feedback on technique and form [3,4].

AI-based sports technology for wearable devices can potentially revolutionize the sports industry. It can help teams and athletes make informed decisions about training and performance. It can also help teams identify potential injuries before they occur, reducing the risk of long-term damage. AI-based sports technology can also help couples and athletes track their progress and identify areas for improvement. This can lead to more efficient and effective training programs, resulting in improved performance on the field. AI-based sports technology can also provide insights into opponent's performance, giving teams a competitive edge [5,6].

## 1.1 Challenges

One of the most significant is the need to collect and analyze vast amounts of data from multiple sources, including video feeds, biometric sensors, and GPS trackers. Another challenge is the development of algorithms that can process this data quickly and accurately, especially when dealing with complex movements and interactions between players. Additionally, there is the challenge of ensuring that the wearable technology is both comfortable and durable enough to withstand the rigours of high-intensity sports. Finally, there is the need to address issues related to privacy and data security, especially given the sensitive nature of the information being collected [7–9].

The main contributions of the research paper are summarized as follows.

1. We have designed a sports health monitoring system that utilizes wearable devices, cloud computing, and machine learning to monitor the health status of sports persons.
2. Developed a deep learning model that combines a Convolutional Neural Network (CNN), Long Short-Term Memory (LSTM), and self-attention mechanisms to predict the health status of sports persons.
3. Evaluated the proposed model on a large sports persons' physiological data dataset and achieved high accuracy, specificity, precision, and F1 score.

The structure of this paper is outlined below. In Section 2, we review the existing literature on the health monitoring of athletes using wearable devices. In Section 3, we describe the proposed methodology in detail. The findings and analysis of the results are presented in Section 4. Finally, we conclude the research in Section 5 and suggest potential avenues for future research.

## 2. Related work

Huifeng focuses on the use of wearable sensors for sports persons. Wearable tracking devices collect health details and exercise records, which are then analyzed and monitored using effective optimization machine learning techniques such as CNN-LSTM [10]. Bermúdez-Edo presents the low-cost, minimally invasive Brain-Computer Interface (BCI) headband to identify motor imagery in EEG data. With a high accuracy of 98.2%, the authors suggest a deep learning classifier based on CNN and LSTM to determine the activity of the persons. The proposed model uses CNN and LSTM for the prediction. The drawback of this method is the input value is not focused on training the particular input [11].

Yi et al. developed an approach that uses statistical feature extraction instead of a Machine Learning (ML) classifier for discriminating between static and dynamic activities, reducing computation. Random Forest (RF) and CNN are then employed to classify specific activities, achieving higher accuracy than state-of-the-art methods. Computation and memory consumption are further reduced by applying pruning and quantizing techniques to CNN. Experimental results show that the proposed method achieves high accuracy and is practical for wearable devices using a single accelerometer [12]. Haghi et al. presented the protocol of various indoor, outdoor, and transition state activities in different categories developed using LSTM and CNN. The hybrid model is not evaluated using the small-scale dataset, so it provides exemplary accuracy. This model fails to work the larger scale dataset [13].

Inturi et al. propose a vision-based approach for fall detection that avoids the inconvenience of wearable devices. The system analyses the joint points of the subject by acquiring a set of key issues through the Alpha Pose pre-trained network. The key points are processed through a CNN framework to analyze spatial correlation, and LSTM architecture is used to preserve long-term dependencies. The system detects five types of falls and six types of daily living activities and achieves commendable results compared to the state-of-the-art approaches. The UP-FALL detection dataset is used for validation [14]. Baltabay et al. outline a framework for gathering and analyzing sensory data from various sensors, such as ECG and inertial sensors, which are then transformed into images using unique preprocessing methods. The proposed approach uses CNN with sensor fusion, random forest, and LSTM with GRU for evaluation and comparison with other models, including transfer learning with Mobile Net [15].

Gao et al. proposed a Bilinear Spatial-Temporal Attention Network (Bi-STAN) for activity recognition. A spatial-temporal attention network is designed to focus on important parts of the data and mine discriminative features. A bilinear pooling method is used to obtain second-order information efficiently. The process is evaluated on multiple datasets and outperforms existing methods in accuracy and efficiency [16].

Wu et al. propose a novel differential spatiotemporal LSTM (DST-LSTM) based Human Activity Recognition (HAR) system based on a pedal wearable device. The proposed model is well suited for pedal wearable devices and may need to work better with other wearable devices. The method uses a graph attention network for the predictions [17].

Afsar et al. proposed a method for detecting and displaying various gestures in a virtual reality game that combines preprocessing, feature extraction, optimization, and recurrent neural network (RNN) classification. The system applies a median filter to the input data and then uses a CNN, power spectral density, skewness, and kurtosis method combination to extract features. It then uses grey wolf optimization to optimize the feature set before feeding the optimized features to an RNN for classification. The system is evaluated using and performs well in a few cases [18].

Patalas-Maliszewska et al. proposed an inertial sensor-based sports activity advisory system using machine learning algorithms. The system uses a convolutional neural network (CNN) with a post-processing block to classify three sports activities: squats, pull-ups, and dips. The system was evaluated on a dataset of 488 instances of the three activities and achieved an accuracy of 0.88–0.92 [19]. Mekruksavanich and Jitpattanakul (2022) proposed a sport-related activity recognition system from wearable sensors using a bidirectional gated recurrent unit (GRU) network. The system was evaluated on the WISDM Sports Dataset, which contains 10,933 instances of 11 sports, and achieved an accuracy of 91.5% [20]. Khater et al. (2022) proposed a novel human activity recognition architecture using a residual inception convolutional LSTM layer. The system was evaluated on the USC-HAD Dataset, which contains 5,344 instances of 10 sports, and achieved an accuracy of 92.8% [21]. Khatun et al. (2022) proposed a deep CNN-LSTM with a self-attention model for human activity recognition using wearable

Table 1. Summary of the sport action recognition-related work.

| Author                    | Year | Methodology                                                                 | Dataset                                              | Findings/Contributions     |
|---------------------------|------|-----------------------------------------------------------------------------|------------------------------------------------------|----------------------------|
| Afsar et al [18]          | 2023 | Convolutional neural network and grey wolf                                  | IMSB, WISDM, and ERICA datasets                      | 85.01%, 88.46%, and 93.18% |
| Patalas et al. [19]       | 2023 | Convolutional neural network (CNN) along with a post-processing block (PPB) | 488 three defined sport activity occurrences Dataset | 92.00%                     |
| Mekruksavanich et al [20] | 2022 | Bidirectional GRU Network                                                   | UCI-DSADS dataset                                    | 99%                        |
| Khater et al [21]         | 2022 | Residual Inception Convolutional Recurrent Layer (ResIncConvLSTM)           | UCF Sports Action dataset                            | 87%                        |
| Khatun et al [22]         | 2022 | Deep CNN-LSTM With Self-Attention                                           | MHEALTH Dataset                                      | 93%                        |

<https://doi.org/10.1371/journal.pone.0292012.t001>

sensors. The system was evaluated on the UEA-Sports Dataset, which contains 6,000 instances of 12 sports, and achieved an accuracy of 93.1% [22]. Table 1 summarizes the sport action recognition-related work.

### 3. Methodology

Sports performance and health monitoring are essential for athletes to maintain peak performance and avoid potential injuries. In recent years, wearable devices have gained popularity among athletes as they can track physiological parameters such as heart rate, body temperature, and motion. However, analysing this data requires advanced machine-learning models to extract meaningful insights. In this context, we propose a system that uses wearable devices, cloud computing, and machine learning to monitor the health status of sports persons. The method comprises two main components: the wearable device and the cloud server. The sportsperson wears the wearable device during training or competition and collects physiological parameters such as heart rate, acceleration, and temperature.

The data collected from the wearable device is then transmitted to the cloud server through a communication gateway. The cloud server contains a machine learning model that analyses the data received from the wearable device and predicts the health status of the sportsperson. The proposed model combines a CNN, LSTM, and self-attention mechanisms. The CNN is used to extract spatial features from the sensor data, while the LSTM captures the temporal dependencies in the data. The self-attention model is applied to focus on the most relevant features for prediction.

The proposed method is trained on a large dataset of sports persons' physiological data to predict their health status accurately. Once the prediction is made, the sportsperson can access the cloud server using their mobile phone and receive a health status report. The report can be used to monitor their performance and make any necessary adjustments to their training or competition schedule. Fig 1 depicts the overview of the proposed approach.

#### 3.1 Data preprocessing and feature extractions

Preprocessing of input sensor data is a crucial step in any machine learning pipeline. It involves the cleaning and preparation of the raw sensor data to remove any noise, artefacts or outliers that can interfere with the accuracy of the machine-learning model. The following are typical steps in preprocessing the sensor data: Data Cleaning: This involves removing any unwanted or irrelevant data points such as null values, missing values, or duplicate records. It is essential to ensure that the data is accurate and consistent. Data Normalization: This step rescales the sensor data to have a consistent scale across all the features. The normalization process ensures that all the features have equal importance and none dominate the others.

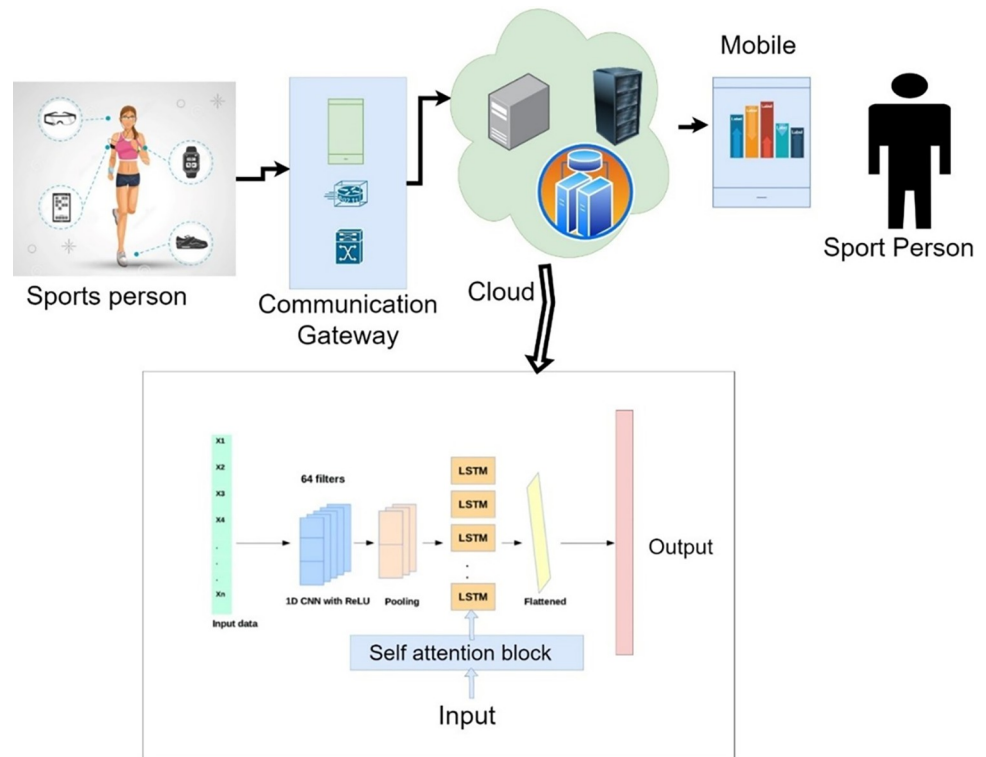

**Fig 1. Overview of health monitoring of the sports person using CNN and LSTM with a self-attention model.**

<https://doi.org/10.1371/journal.pone.0292012.g001>

**Filtering:** This step involves removing noise and unwanted signals from the sensor data. Different filters, such as low-pass, high-pass, and band-pass filters, can eliminate noise from the data. **Smoothing:** This technique removes sharp variations in the sensor data by applying a moving average filter. Smoothing can reduce the effect of noise in the data. **Feature Extraction:** This step involves identifying the sensor data's essential features that can help predict the target variable. By performing these preprocessing steps on the input sensor data, we can obtain a clean and normalized dataset ready for use in a machine-learning model. The preprocessing step's quality directly impacts the accuracy and robustness of the final machine-learning model.

We have explored methods to remove direct identifiers from the collected health data. This includes techniques like generalization and suppression of personal information, making it impossible to link the data back to specific individuals.

**DE-identification.** We have examined strategies to transform personal data in a way that prevents the identification of individuals. This process involves removing or altering unique identifiers, such as names, contact details, and social security numbers.

**Data security.** We have extensively addressed the issue of data security to safeguard athletes' health data from breaches and unauthorized access. **Encryption:** We have incorporated AES encryption mechanisms to ensure data is securely transmitted between wearable devices, communication gateways, and the cloud server. This prevents interception and unauthorized access to sensitive information.

**Access controls.** We have implemented strict access controls, limiting data access only to authorized personnel who require the information for legitimate purposes. This prevents unauthorized parties from viewing or manipulating athletes' health data. **Data Breach Protocols:** In anticipation of potential security breaches, we have outlined protocols to handle data

breaches effectively. These protocols include notification procedures, mitigation strategies, and recovery plans. By employing these measures, we aim to establish a robust data security framework that maintains the confidentiality and integrity of athletes' health data throughout its lifecycle.

### 3.2 CNN and LSTM with self-attention

The CNN and LSTM layers extract features and capture temporal dependencies, respectively. The concatenated output is then passed through a self-attention layer to focus on essential elements. Finally, a fully connected layer is used to map the self-attention layer's output to the sportsperson's predicted health status.

**CNN:** The input  $x_{\{l-1\}}$  is convolved with a set of learnable filters  $W_l$  and a bias term  $b_l$  is added. The result is an intermediate output  $Z_l$ . The output  $Z_l$  then undergoes a non-linear activation function  $f$ , such as the rectified linear unit (ReLU), to produce the final output  $A_l$ . The intermediate output is represented in Eq 1. The final output is computed using Eq 2.

$$Z_l = W_l * x_{\{l-1\}} + b_l \quad (1)$$

$$A_l = f(Z_l) \quad (2)$$

**Max-pooling.** Max-pooling is a down-sampling operation that reduces the spatial dimensions of the input by taking the maximum value over a small neighbourhood. This is typically used after a convolutional layer to reduce the dimensionality of the feature maps. The max pooling is computed using Eq 3.

$$A_l = \text{Max-pol}(A_{\{l-1\}}) \quad (3)$$

**LSTM.** LSTM is a recurrent neural network (RNN) type designed to remember long-term dependencies in time series data. At each time step  $t$ , the LSTM has an input  $x_t$  and a hidden state  $h_{\{t-1\}}$ . The input and hidden state are concatenated and multiplied by a set of learnable weights and biases to produce input, forget, and output gate vectors,  $i_t$ ,  $f_t$ , and  $o_t$ , respectively. A candidate hidden state  $g_t$  is computed by applying the hyperbolic tangent activation function (tanh) to a weighted sum of the input and previous hidden state. The final cell state  $c_t$  is calculated as a combination of the last state  $c_{\text{ell } c\{t-1\}}$  and the candidate hidden state  $g_t$ , weighted by the input and forget gates. The final hidden state  $h_t$  is computed by applying the output gate  $o_t$  to the hyperbolic tangent of the cell state  $c_t$ .

$$i_t = \text{sigmoid}(W_i * [h_{\{t-1\}}, x_t] + b_i) \quad (4)$$

$$f_t = \text{sigmoid}(W_f * [h_{\{t-1\}}, x_t] + b_f) \quad (5)$$

$$o_t = \text{sigmoid}(W_o * [h_{\{t-1\}}, x_t] + b_o) \quad (6)$$

$$g_t = \text{Tanh}(W_g * [h_{\{t-1\}}, x_t] + b_g) \quad (7)$$

$$c_t = f_t * c_{\{t-1\}} + i_t * g_t \quad (8)$$

$$h_t = o_t * \tanh(c_t) \quad (9)$$



**Self-attention.** Self-attention is a mechanism that allows a neural network to selectively focus on parts of the input most relevant to the task at hand. At each layer, the input  $A_l$  is multiplied by a learnable weight matrix  $W_e$  and a bias term  $b_e$  is added. The result is passed through a hyperbolic tangent activation function to produce an intermediate vector  $e_t$ . The attention weights  $a_t$  are then computed by applying the SoftMax function to a linear combination of the medium vector and a learnable weight vector  $w$ .

$$o_t = \tanh(W_e * A_l + b_e) \quad (10)$$

$$a_t = \text{softmax}(w^T * e_t) \quad (11)$$

**Fully-connected.** In a fully-connected layer, the input is flattened and multiplied by a weight matrix  $W_b$  with a bias term  $b_l$  added. The resulting output is then passed through a non-linear activation function  $f$  to produce the final output,  $A_l$ .

$$o_t = W_l * (a_t * A_l) + b_l \quad (12)$$

$$A_l = f(Z_l) \quad (13)$$

Output: The final output of the model is given by the output of the last fully connected layer,  $A_b$ , which is used to predict the target variable of the task, such as the health status of a sportsperson.

$$Y = A_l \quad (14)$$

### 3.3 Deployment and testing in the cloud

After developing the CNN and LSTM with a self-attention model for predicting the health status of sportspersons, the next step is to deploy and test the system in the cloud. The deployment process involves transferring the model from the local environment to the cloud server. Once the model is deployed on the cloud server, it can be accessed by sports persons using their mobile devices. The deployment process involves several steps, including Setting up the cloud server. This involves creating a virtual machine in the cloud with the specifications to host the model. Installing dependencies: The required software libraries and dependencies must be installed on the cloud server to support the model. Uploading the model: The trained model is then uploaded to the cloud server. Creating an API endpoint: An API endpoint is designed to allow sportspersons to access the model through their mobile devices. Once the model is deployed, it must be tested to ensure it works correctly. The testing process involves passing sample sensor data through the system and verifying that the predictions made by the model are accurate. This is done by comparing the predictions made by the model to the actual health status of the sportsperson. The testing process involves the following steps: Collecting sample data: Sample sensor data is collected from sports persons in different health states. Pre-processing the data: The collected data is preprocessed to remove any noise or outliers. Passing the data through the model: The preprocessed data is passed through the deployed model, and the predictions are made. Evaluating the results: The projections made by the model are compared to the actual health status of the sportspersons, and the model's accuracy is evaluated. If the model performs well during testing, it can be made available for use by sports persons. The deployed model can be accessed through an API endpoint, and sports persons can pass their sensor data through the system to obtain predictions about their health status. The system can also be monitored and updated regularly to ensure it continues performing well over time.

**Cost considerations.** Implementing a comprehensive sports performance and health monitoring system involves various cost considerations. These include Wearable Devices:

Procuring high-quality wearable devices capable of capturing accurate physiological data may require a significant upfront investment. Cloud Infrastructure: Setting up and maintaining the cloud infrastructure for data storage, processing, and deployment involves ongoing operational costs. Machine Learning Resources: Training and deploying machine learning models, especially those involving deep learning, require computational resources, which could lead to cloud service costs. Data Transmission: Transferring data from wearable devices to the cloud incurs data transmission costs, especially if the data volume is substantial. Development and Maintenance: Costs of developing the proposed system, including software development, algorithm design, and ongoing maintenance, must be considered. Mobile App Development: Creating a mobile app for sportspersons to access their health reports entails development costs. Security Measures: Implementing robust data security measures to protect athletes' health data requires investment in cybersecurity tools and practices. Regular Updates: Keeping the system up-to-date with the latest algorithms, data sources, and technologies involves continuous investments.

**Scalability.** The proposed system's scalability is crucial to accommodate a growing number of users and increasing data volume. Wearable Devices: Ensuring the system can integrate data from a wide range of wearable devices used by various sports persons. Cloud Infrastructure: Scaling up cloud resources to efficiently handle increased data processing and user requests.

**Integration with existing infrastructure.** Integrating the proposed system with existing sports infrastructure is essential for practical adoption. Data Compatibility: Ensuring wearable devices' data formats are compatible with the system's requirements. API Development: Creating APIs that allow seamless integration between wearable devices, cloud servers, and mobile applications. Interoperability: Ensuring the system can integrate with various sports-related software and platforms. User Adoption: Designing user-friendly interfaces and ensuring athletes and coaches can easily integrate the system into their training routines. Data Privacy and Regulations: Ensuring compliance with data privacy regulations and ethical considerations when integrating with existing systems.

## 4. Results discussion

We have discussed the experimental environment and dataset descriptions and evaluated the performances of the proposed model against the existing model.

### 4.1 Experimental environment

The experimental environment for the sportsperson health monitoring system consists of multiple components. Sensor Devices: Wearable sensor devices are used to capture the physical activity data of the sports persons. Sports persons wear these sensor devices during their training sessions or competitions. The machines are equipped with sensors and accelerometers to capture different types of movement data. Google Cloud Platform (GCP) was used to deploy and run the experiments for the sports person health monitoring system. Compute Engine: Virtual machine instances were created and used to run the code for data processing, model training, and testing. Cloud Storage: Data files were stored in Cloud Storage buckets and accessed from the virtual machines. [Fig 2](#) shows the sensor location. The experimental environment is shown in [Table 2](#).

### 4.2 Dataset descriptions

The OPPORTUNITY Activity Recognition dataset is a publicly available dataset used for human activity recognition (HAR) research. The dataset was collected by a group of



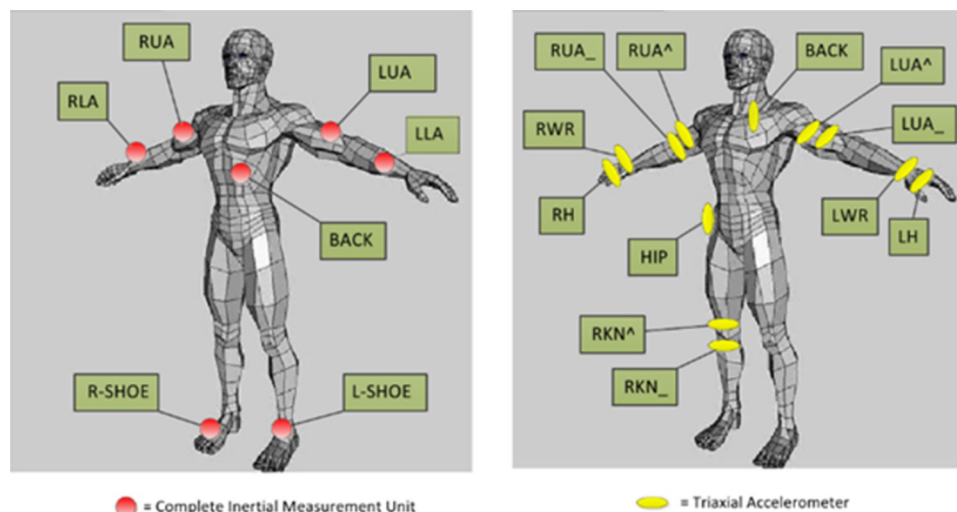

**Fig 2. Sensor location.**

<https://doi.org/10.1371/journal.pone.0292012.g002>

researchers from Università degli Studi di Trento, Italy. The dataset contains sensor data collected from wearable devices worn by 4 healthy subjects and 4 subjects with motor impairments performing various activities of daily living (ADL) and gestures. The sensors used in this dataset include an accelerometer, a gyroscope, a magnetometer, and 19 pressure sensors. The dataset provides data for 5 sensor modalities: right wrist, right ankle, left thigh, waist, and chest. The dataset contains 4 sub-datasets: OPPORTUNITY dataset, OPPORTUNITY2 dataset, OPPORTUNITY3 dataset, and OPPORTUNITY4 dataset. The OPPORTUNITY dataset is the largest of the sub-datasets. It includes data from all sensors and subjects, while the other sub-datasets contain data from a subset of sensors or subjects. The activities in the dataset include walking, jogging, going upstairs, going downstairs, sitting, standing, lying on the back, lying on the right side, ascending stairs, and descending stairs. The gestures in the dataset include opening/closing a door, drinking from a bottle, picking up a book, and placing a book on a shelf [23].

The Sports-1M dataset encompasses an extensive collection of videos sourced from YouTube, surpassing a million in number. These videos are accessible via YouTube URLs provided by the authors. These videos are thoughtfully categorized into 487 sports-related classes, each with between 1,000 and 3,000 associated videos. Labelling these videos is a meticulously executed process. Automated labelling is employed, wherein the YouTube Topics API assigns one of the 487 sports classes to each video [24]. The training dataset constituted 80% of the data, while the validation and testing set accounted for 10%. The parameter setting for our proposed system is presented in Table 3.

**Table 2. Experimental environment.**

| Experimental Environment | Components                                                                      |
|--------------------------|---------------------------------------------------------------------------------|
| Sensor Devices           | Fitbit Charge 4," "Apple Watch Series 7," and "Garmin Forerunner 945            |
| Cloud Platform           | Google Cloud Platform (GCP) is used for deployment and experiments.             |
| Compute Engine           | Linux Virtual machine instances running data processing, training, and testing. |
| Cloud Storage            | Data files are stored in Cloud Storage buckets and accessed from VMs.           |
| Mobile Application       | Android OS and Apple                                                            |

<https://doi.org/10.1371/journal.pone.0292012.t002>

**Table 3. The parameter configuration for our proposed system.**

| Parameter        | Value/Setting                                                  |
|------------------|----------------------------------------------------------------|
| Dataset          | OPPORTUNITY Activity Recognition dataset and Sports-1M dataset |
| Data Split       | Training: 80%, Validation: 10%, Testing: 10%                   |
| Preprocessing    | DE-identification                                              |
| Models           | CNN and LSTM with self-attention                               |
| Hyperparameters  | Learning Rate, Batch Size, Optimizer (Adam-Deleta)             |
| Number of Epochs | 10–300                                                         |
| Dropout rate     | .2                                                             |
| Loss Function    | Categorical Cross-Entropy                                      |
| Batch Size       | 16, 32                                                         |

<https://doi.org/10.1371/journal.pone.0292012.t003>

### 4.3 Ablation study

We have conducted the ablation study to evaluate our model performances with different configurations. Tables 4 and 5 show that the accuracy of the CNN-LSTM model can vary depending on the number of LSTM units and CNN units. The more complex model gives the best accuracy, so we have taken the proposed system's CNN-LATM model with 32 and 32 units. The simple model needs to provide better performances for our scenario.

Table 6 shows that the CNN-LSTM model with self-attention has a slightly higher accuracy than the CNN-LSTM model without self-attention. This suggests that self-attention can be an essential component of CNN-LSTM models for sequence modelling tasks. The sport activity recognition complex pattern needs attention to the model train, so we have taken CNN-LSTM with self-attention in the proposed system. The ablation study demonstrates that the choice of LSTM and CNN unit can significantly impact the performance of the "CNN and LSTM with Self-Attention" model.

### 4.4 Performances comparisons

Table 7 compares the performance of different sports person health monitoring models based on various evaluation metrics such as accuracy, specificity, precision, and F1 score. Afsar [18] achieved an accuracy of 0.75, indicating the proportion of correctly classified instances out of the total. Patalas et al. [19] attained a slightly improved accuracy of 0.8, suggesting a better classification performance. Mekruksavanich et al. [20] demonstrated further enhancement with an accuracy of 0.81, indicating a consistent upward trend. Khater et al. [21] significantly increased accuracy to 0.87, indicating the ability to classify a more substantial portion of instances correctly. Khatun et al. [22] achieved a notable accuracy of 0.91, showcasing an even higher predictive accuracy. The proposed system showed the highest accuracy among the compared models at 0.93, implying the potential for improved prediction capabilities. In terms of training and performance, our proposed models with self-attention mechanisms tend to be more complex and computationally intensive than plain CNN-LSTM models. This is because self-attention requires additional computations to be performed at each timestep. However,

**Table 4. Accuracy comparison with simple model.**

| Parameters | Values |
|------------|--------|
| LSTM unit  | 16     |
| CNN unit   | 16     |
| Accuracy   | 0.85   |

<https://doi.org/10.1371/journal.pone.0292012.t004>

Table 5. Accuracy comparison with a complex model.

| Parameters | Values |
|------------|--------|
| LSTM unit  | 32     |
| CNN unit   | 32     |
| Accuracy   | 0.89   |

<https://doi.org/10.1371/journal.pone.0292012.t005>

this additional complexity can result in improved accuracy and performance. Overall, while CNN-LSTM models can be effective for sequential data processing tasks, adding self-attention mechanisms can significantly improve accuracy and performance. However, the increased complexity and computational requirements should be considered when deciding on the appropriate model architecture for a given task.

Afsar [18] Achieved a specificity of 0.66, reflecting the ability to capture true negatives effectively. Patalas et al. [19]: Improved the specificity to 0.73, suggesting a better performance in correctly identifying negatives. Mekruksavanich et al. [20] Displayed an enhanced specificity of 0.76, indicating further effective handling of true negatives. Khater et al. [21] further increased specificity to 0.85, showcasing consistent improvement in distinguishing negatives. Khatun et al. [22] demonstrated high specificity at 0.87, implying robust performance in identifying true negatives. The proposed system attained the highest specificity at 0.94, highlighting strong capabilities in accurate negative classification.

Afsar [18] Achieved an F1 score of 0.8, the harmonic mean of precision and recall. Patalas et al. [19] achieved an F1 score of 0.84, showcasing a balanced performance between precision and recall. Mekruksavanich et al. [20] maintained an F1 score of 0.84, suggesting a consistent balance in predictive performance. The proposed system displayed the highest F1 score at 0.92, indicating a strong balance between precision and recall. The proposed system consistently demonstrated superior performance across all parameters, including accuracy, specificity, precision, and F1 score. This suggests that the proposed method can outperform existing models in terms of predictive accuracy, balance between classification metrics, and overall quality of outcomes. Fig 3 depicts the comparison of the existing and proposed system. Fig 4 displays the ROC curve of the proposed approach. The generated ROC curve visually presents the classification performance of the proposed method, highlighting its ability to distinguish between positive and negative instances.

## 5. Conclusions

Sports health monitoring system has the potential to revolutionize the way sports persons monitor their health status. The combination of wearable devices, cloud computing, and machine learning can provide accurate and timely information about their health status, allowing sports persons to adjust their training or competition schedule and avoid potential injuries. The model achieves an highest accuracy among the existing state art of the methods and, demonstrating its effectiveness in predicting the health status of sports persons. Future research directions for this system could focus on expanding the dataset to include a more diverse group of sportspersons, including those with pre-existing medical conditions. Additionally, the research could focus on developing a more personalized approach to monitoring the health

Table 6. Accuracy comparison.

| Model                      | Accuracy |
|----------------------------|----------|
| Accuracy with attention    | .93      |
| Accuracy without attention | 0.90     |

<https://doi.org/10.1371/journal.pone.0292012.t006>

Table 7. Performances comparisons of different models.

| Model                     | Accuracy | Specificity | Precession | F1 score |
|---------------------------|----------|-------------|------------|----------|
| Afsar et al [18]          | 0.75     | 0.66        | 0.8        | 0.8      |
| Patalas et al. [19]       | 0.8      | 0.73        | 0.84       | 0.84     |
| Mekruksavanich et al [20] | 0.81     | 0.76        | 0.85       | 0.84     |
| Khater et al. [21]        | 0.87     | 0.85        | 0.88       | 0.88     |
| Khatun et al [22]         | 0.91     | 0.87        | 0.9        | 0.89     |
| Proposed system           | 0.93     | 0.94        | 0.95       | 0.92     |

<https://doi.org/10.1371/journal.pone.0292012.t007>

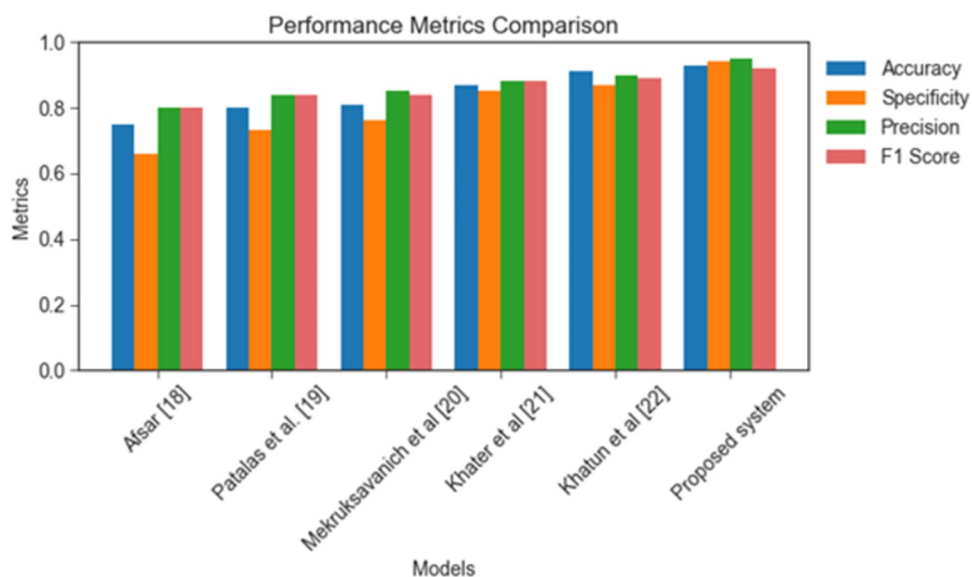

Fig 3. Comparisons of the proposed system and existing model.

<https://doi.org/10.1371/journal.pone.0292012.g003>

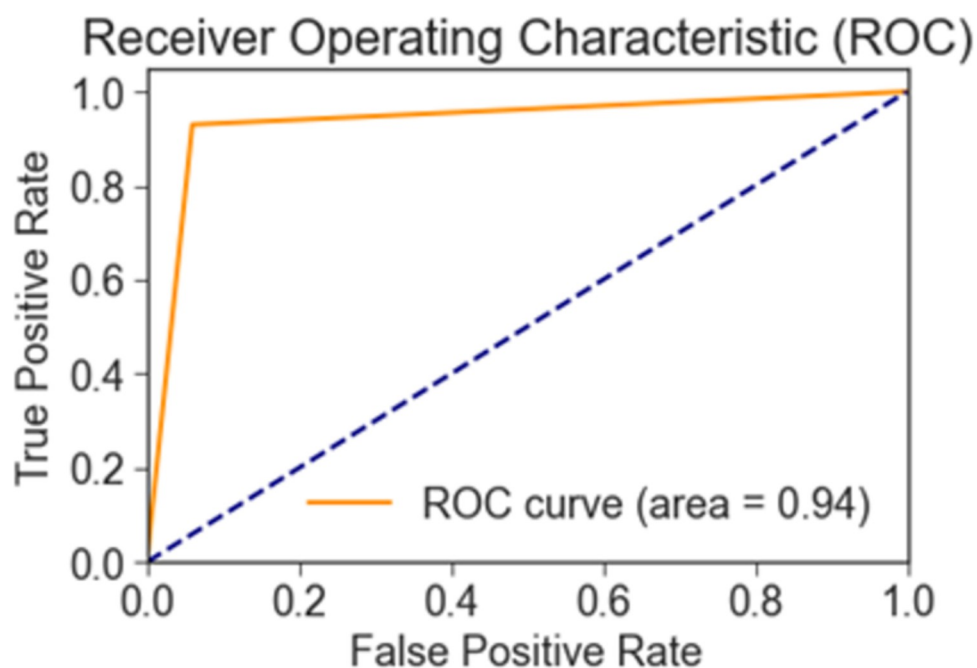

Fig 4. ROC curve of the proposed system.

<https://doi.org/10.1371/journal.pone.0292012.g004>

status of sportspersons, considering individual differences in physiology and training schedules. Finally, incorporating real-time feedback and alerts for potential health risks could be an essential next step to further enhance the system's effectiveness. The proposed sports health monitoring system provides a promising foundation for future research and development.

## Author Contributions

**Conceptualization:** Yao Fan.

**Methodology:** Yao Fan.

**Software:** Tao Yuhuan Wang, Jiajia Cui.

**Validation:** Tao Yuhuan Wang, Jiajia Cui.

**Writing – original draft:** Yao Fan.

**Writing – review & editing:** Yao Fan.

## References

1. Sarveshwaran V.; Joseph I.T.; Maravarman M.; Karthikeyan P. Investigation on Human Activity Recognition using Deep Learning. *Procedia Comput. Sci.* 2022, 204, 73–80. <https://doi.org/10.1016/j.procs.2022.08.009>
2. Kakhi K.; Alizadehsani R.; Kabir H.D.; Khosravi A.; Nahavandi S.; Acharya U.R. The Internet of Medical Things and Artificial Intelligence: Trends, Challenges, and Opportunities. *Biocybern. Biomed. Eng.* 2022, 42, 287–308.
3. Jain, A.; Gandhi, K.; Ginoria, D.K.; Karthikeyan, P. Human Activity Recognition with Videos Using Deep Learning. In *Proceedings of the 2021 International Conference on Forensics, Analytics, Big Data, Security (FABS)*, Pune, India, 17–18 December 2021; IEEE: Piscataway, NJ, USA, 2021; pp. 1–5. <https://doi.org/10.1109/FABS52071.2021.9702599>.
4. Palanivel Rajan, D.; Baswaraj, D.; Velliangiri, S.; Karthikeyan, P. Next Generations Data Science Application and Its Platform. In *Proceedings of the 2020 International Conference on Smart Electronics and Communication (ICOSEC)*, Trichy, India, 7–9 October 2020; IEEE: Piscataway, NJ, USA, 2020; pp. 141–146. <https://doi.org/10.1109/ICOSEC49089.2020.9215245>.
5. Utomo, S.; John, A.; Pratap, A.; Jiang, Z.S.; Karthikeyan, P.; Hsiung, P.A. AIX Implementation in Image-Based PM2.5 Estimation: Toward an AI Model for Better Understanding. In *Proceedings of the 2023 15th International Conference on Knowledge and Smart Technology (KST)*, Chiang Mai, Thailand, 1–3 February 2023; IEEE: Piscataway, NJ, USA, 2023; pp. 1–6. <https://doi.org/10.1109/KST57286.2023.10086917>.
6. Górriz J.M.; Ramírez J.; Ortíz A.; Martínez-Murcia F.J.; Segovia F.; Suckling J.; et al. Artificial Intelligence within the Interplay between Natural and Artificial Computation: Advances in Data Science, Trends and Applications. *Neurocomputing* 2020, 410, 237–270.
7. Incel O.D.; Bursa S.O. On-Device Deep Learning for Mobile and Wearable Sensing Applications: A Review. *IEEE Sens. J.* 2023. <https://doi.org/10.1109/JSEN.2023.3116925>
8. Khan Y.A.; Imaduddin S.; Singh Y.P.; Wajid M.; Usman M.; Abbas M. Artificial Intelligence Based Approach for Classification of Human Activities Using MEMS Sensors Data. *Sensors* 2023, 23, 1275. <https://doi.org/10.3390/s23031275> PMID: 36772315
9. Velliangiri S.; Anbarasu V.; Karthikeyan P.; Anandaraj S.P. Intelligent Personal Health Monitoring and Guidance Using Long Short-Term Memory. *J. Mobile Multimedia.* 2021, 17, 349–372. <https://doi.org/10.13052/jmm1550-4646.18210>.
10. Huifeng W.; Kadry S.N.; Raj E.D. Continuous Health Monitoring of Sportsperson Using IoT Devices Based Wearable Technology. *Comput. Commun.* 2020, 160, 588–595.
11. Bermúdez-Edo M. A CNN-LSTM Deep Learning Classifier for Motor Imagery EEG Detection Using a Low-Invasive and Low-Cost BCI Headband. *Sensors* 2023, 23, 2066. <https://doi.org/10.3390/s23092066>.
12. Yi M.K.; Lee W.K.; HWANG S.O. A Human Activity Recognition Method Based on Lightweight Feature Extraction Combined with Pruned and Quantized CNN for Wearable Device. *IEEE Trans. Consum. Electron.* 2023, 69, 718–725. <https://doi.org/10.1109/TCE.2022.3172471>.

13. Haghi M.; Ershadi A.; Deserno T.M. Recognizing Human Activity of Daily Living Using a Flexible Wearable for 3D Spine Pose Tracking. *Sensors* 2023, 23, 2066. <https://doi.org/10.3390/s23042066> PMID: 36850664
14. Inturi A.R.; Manikandan V.M.; Garrapally V. A Novel Vision-Based Fall Detection Scheme Using Key-points of Human Skeleton with Long Short-Term Memory Network. *Arab. J. Sci. Eng.* 2023, 48, 1143–1155. <https://doi.org/10.1007/s13369-022-06382-4>.
15. Baltabay M.; Yazici A.; Sterling M.; Ever E. Designing Efficient and Lightweight Deep Learning Models for Healthcare Analysis. *Neural Process. Lett.* 2023, 1–31. <https://doi.org/10.1007/s11063-023-10455-x>.
16. Gao C.; Chen Y.; Jiang X.; Hu L.; Zhao Z.; Zhang Y. Bi-STAN: Bilinear Spatial-Temporal Attention Network for Wearable Human Activity Recognition. *Int. J. Mach. Learn. Cybern.* 2023, 1–17. <https://doi.org/10.1007/s13042-023-01496-x>.
17. Wu H.; Zhang Z.; Li X.; Shang K.; Han Y.; Geng Z.; et al. A Novel Pedal Musculoskeletal Response Based on Differential Spatio-Temporal LSTM for Human Activity Recognition. *Knowl.-Based Syst.* 2023, 261, 110187. <https://doi.org/10.1016/j.knosys.2021.110187>.
18. Afsar M.M.; Saqib S.; Aladfaj M.; Alatiyyah M.H.; Alnowaiser K.; Aljuaid H.; et al. Body-Worn Sensors for Recognizing Physical Sports Activities in Exergaming via Deep Learning Model. *IEEE Access* 2023, 11, 12460–12473. <https://doi.org/10.1109/ACCESS.2022.2967871>.
19. Patalas-Maliszewska J.; Pajak I.; Krutz P.; Pajak G.; Rehm M.; Schlegel H.; et al. (2023). Inertial Sensor-Based Sport Activity Advisory System Using Machine Learning Algorithms. *Sensors*, 23(3), 1137. <https://doi.org/10.3390/s23031137> PMID: 36772178
20. Mekruksavanich S., & Jitpattanakul A. (2022). Sport-Related Activity Recognition from Wearable Sensors Using Bidirectional GRU Network. *Intelligent Automation & Soft Computing*, 34(3).
21. Khater S., Hadhoud M., & Fayek M. B. (2022). A novel human activity recognition architecture: using residual inception ConvLSTM layer. *Journal of Engineering and Applied Science*, 69(1), 45.
22. Khatun M. A., Yousuf M. A., Ahmed S., Uddin M. Z., Alyami S. A., Al-Ashhab S., et al. (2022). Deep CNN-LSTM with a self-attention model for human activity recognition using the wearable sensor. *IEEE Journal of Translational Engineering in Health and Medicine*, 10, 1–16.
23. Lukowicz, P. et al. Recording a Complex, Multi-Modal Activity Data Set for Context Recognition. In *Proceedings of the 1st Workshop on Context-Systems Design, Evaluation and Optimisation at ARCS*, 2010, Erlangen, Germany, 22 February 2010. <https://doi.org/10.1145/1730836.1730840>.
24. Ramesh M., & Mahesh K. (2022). The Sports video classification framework uses an enhanced threshold-based Keyframe Selection algorithm and customized CNN on the UCF101 and Sports1-M dataset. *Computational Intelligence and Neuroscience*, 2022.
